# Supplementary material for: Novel lithium-loaded porous aromatic framework for efficient CO2and H2uptake
Source: Royal Society of Chemistry journal article supplement (doi:10.1039/c2ta00616b), 2012-10-18
Supplement: c2ta00616b.pdf [file c2ta00616b.pdf]

## Electronic Supplementary Information

### **Novel lithium-laded porous aromatic framework for efficient CO<sub>2</sub> and H<sub>2</sub> uptake**

**Heping Ma,<sup>a</sup> Hao Ren,<sup>a</sup> Xiaoqin Zou,<sup>a</sup> Fuxing Sun,<sup>a</sup> Zhuojun Yan,<sup>a</sup> Kun Cai,<sup>a</sup> Dayang Wang<sup>b</sup> and Guangshan Zhu<sup>\*a,c</sup>**

<sup>a</sup> *State Key Laboratory of Inorganic Synthesis & Preparative Chemistry, Jilin University, Changchun, 130012, China.*

<sup>c</sup> *Queensland Micro- and Nanotechnology Centre, Griffith University, Queensland, 4111, Australia.*

*Fax: (+ 86)431-8516-8331*

*E-mail: zhugs@jlu.edu.cn*

<sup>b</sup> *Ian Wark Research Institute University of South Australia Mawson Lakes Campus Adelaide, SA 5095, Australia*

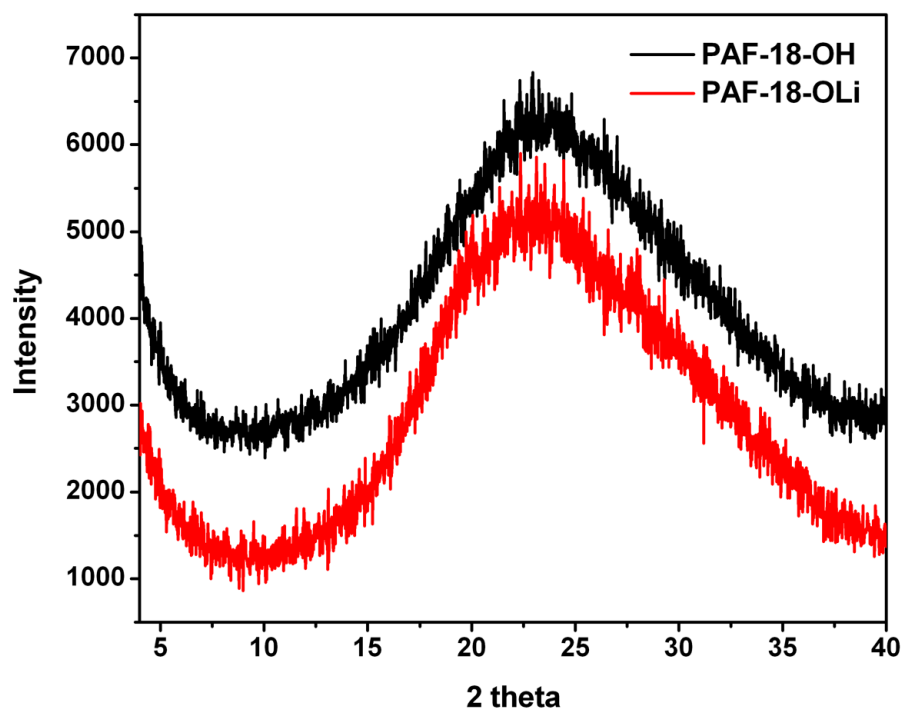

**Fig. S1** PXRD patterns of PAF-18-OH and PAF-18-OLi samples.

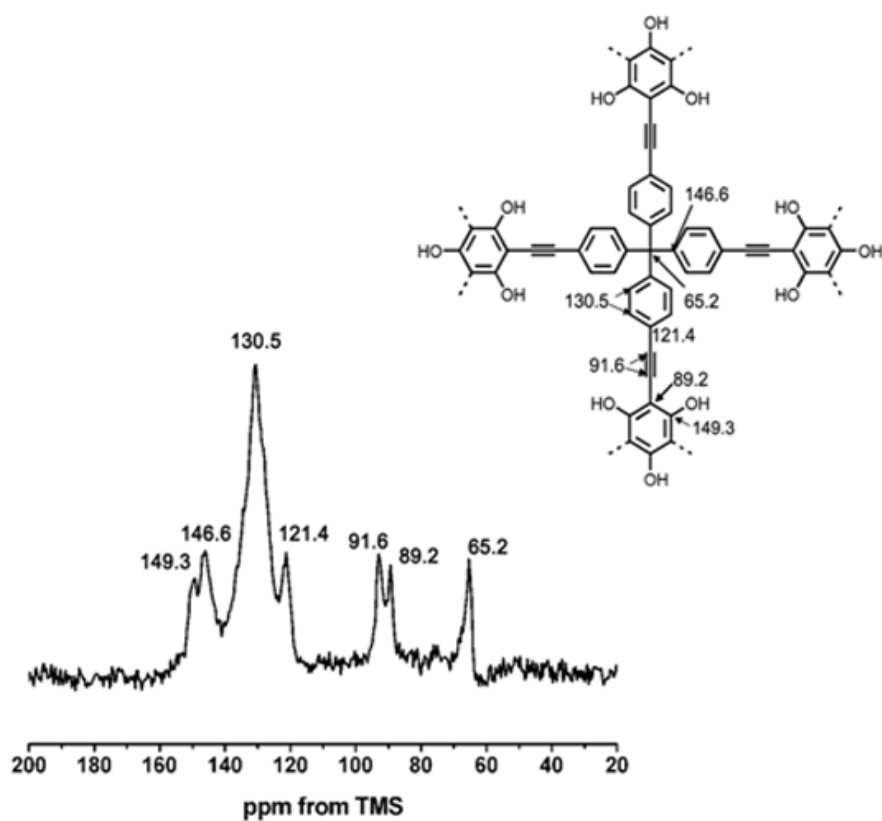

**Fig. S2**  $^{13}\text{C}$  CP/MAS NMR spectrum of PAF-18-OH.

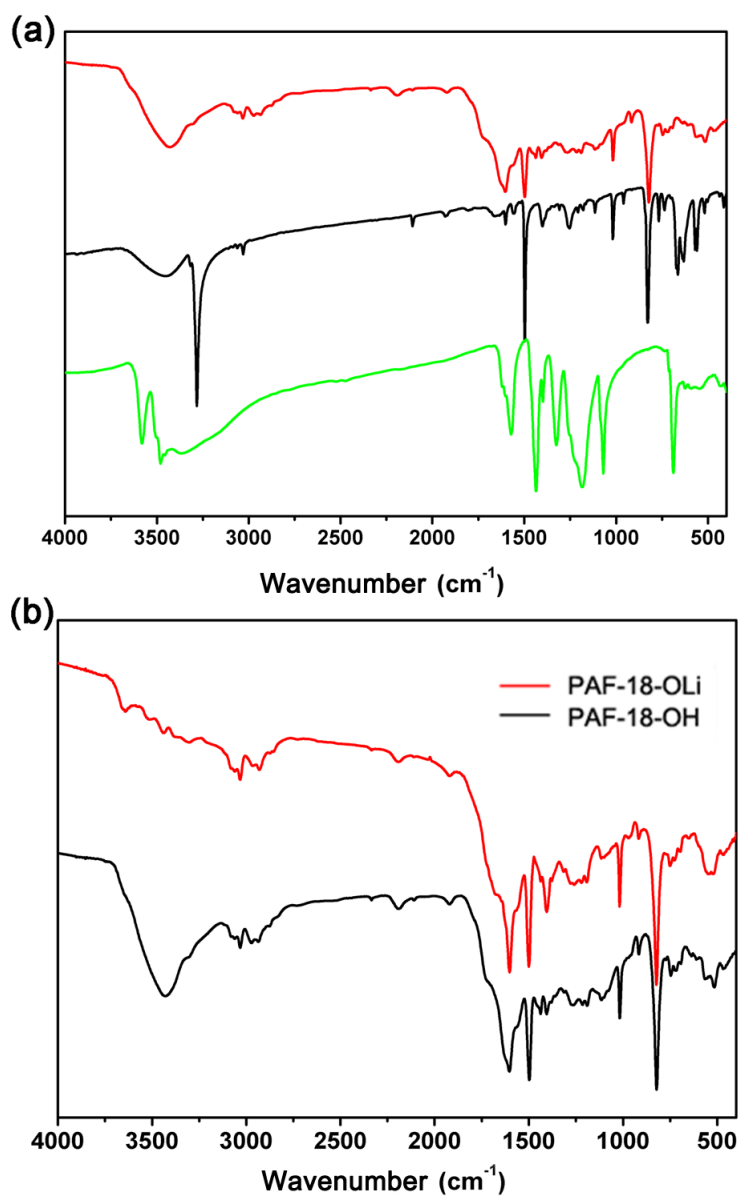

**Fig. S3** (a) FTIR spectra of tetrakis(4-ethynylphenyl)methane (black), 2,4,6-tribromo-benzene-1,3,5-triol (green) and PAF-18-OH (red), (b) FT-IR spectra of PAF-18-OH and PAF-18-OLi products.

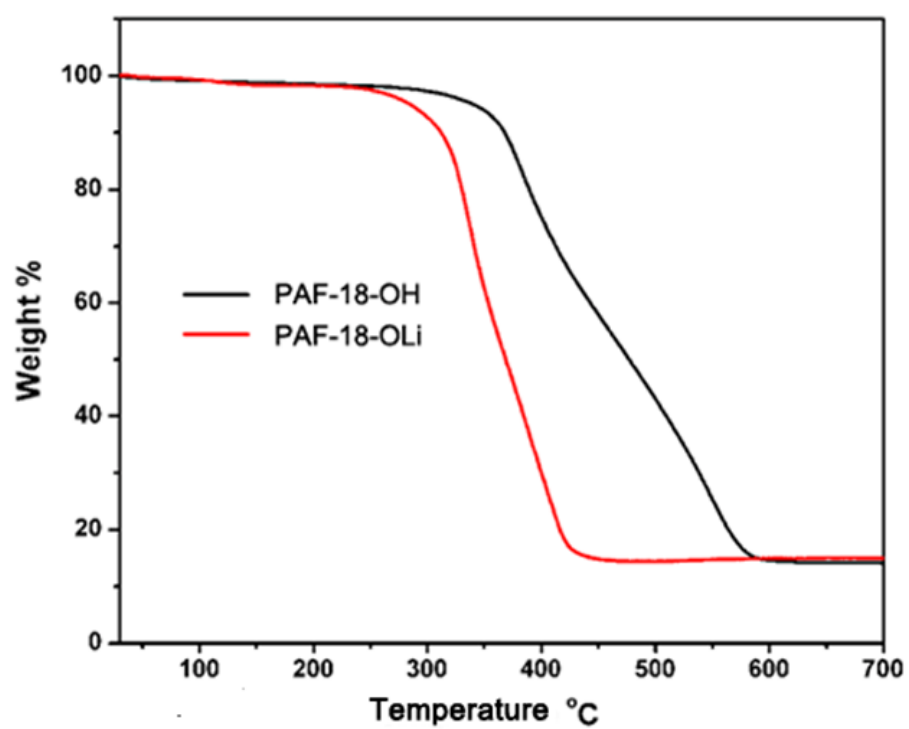

**Fig. S4** TG curves of PAF-18-OH and PAF-18-OLi samples.

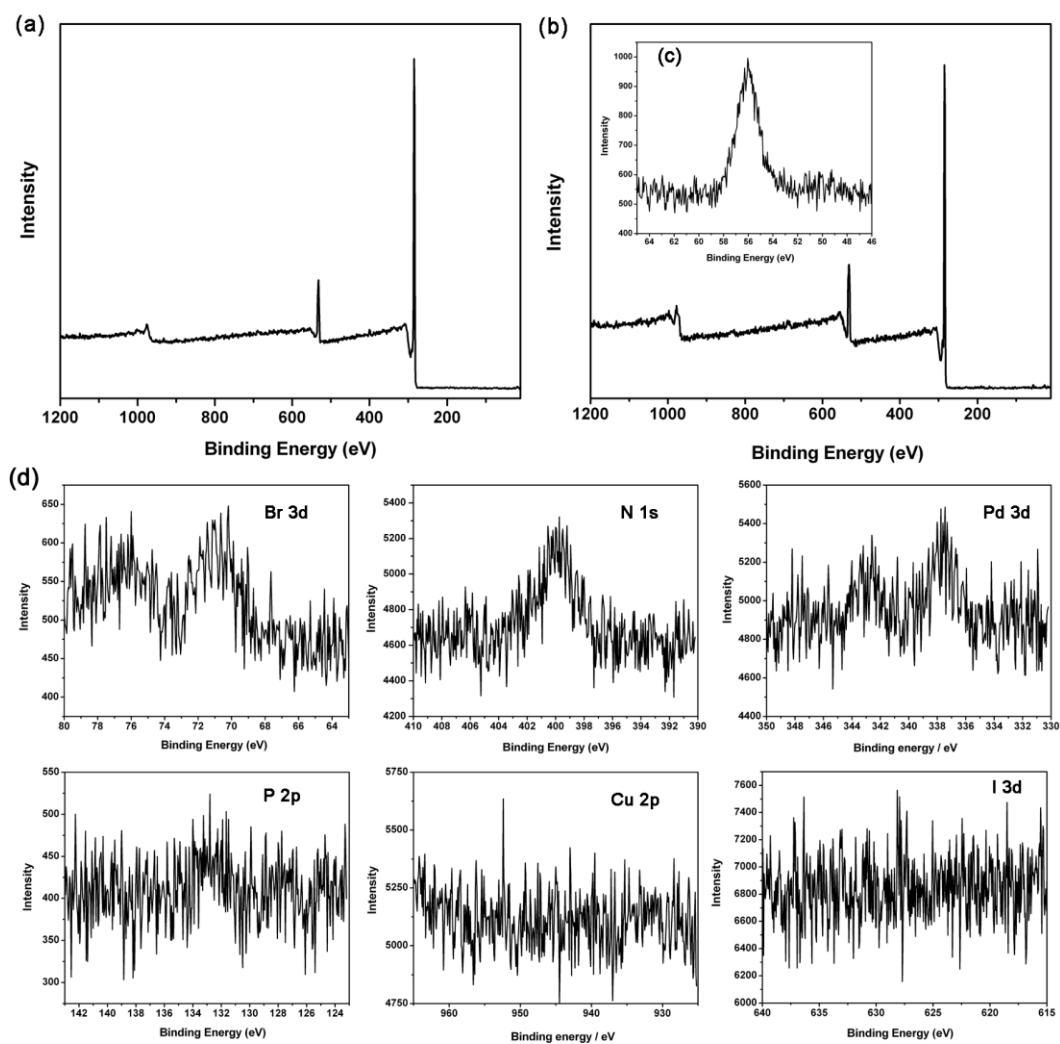

**Fig. S5** XPS spectra of PAF-18-OH (a), PAF-18-OLi (b), Li 1s spectrum of PAF-18-OLi (c), and enlarged views of XPS spectra of Br 3d, N 1s, Pd 3d, P 2p, Cu 2p and I 3d (d) in the PAF-18-OH sample.

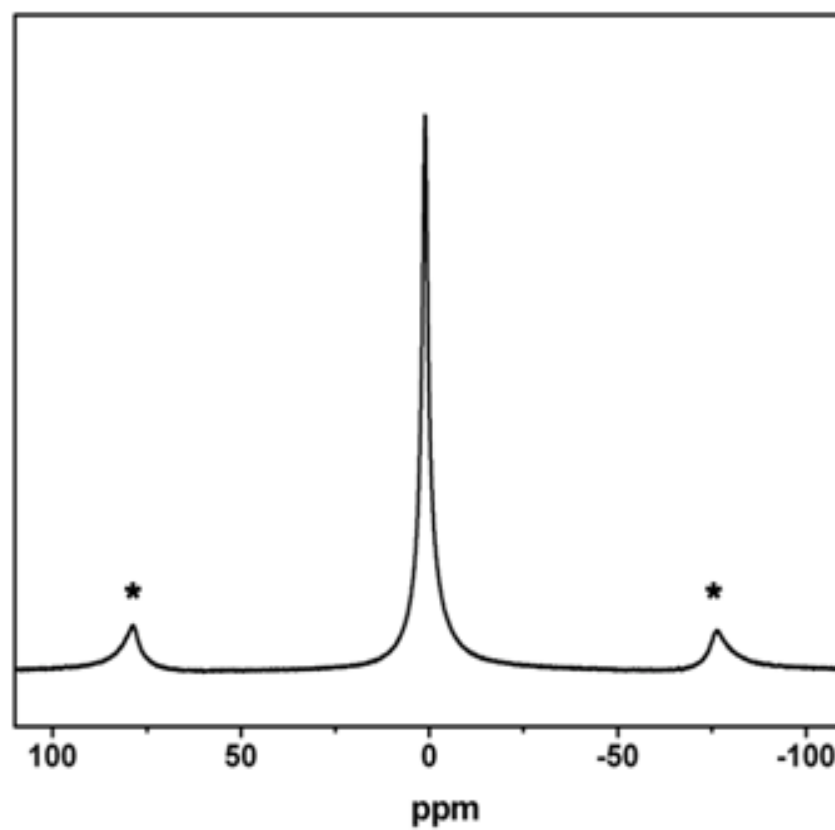

**Fig. S6**  $^7\text{Li}$  MAS NMR spectrum of PAF-18-OLi exhibiting a single resonance at  $\delta = 0.80$  ppm.

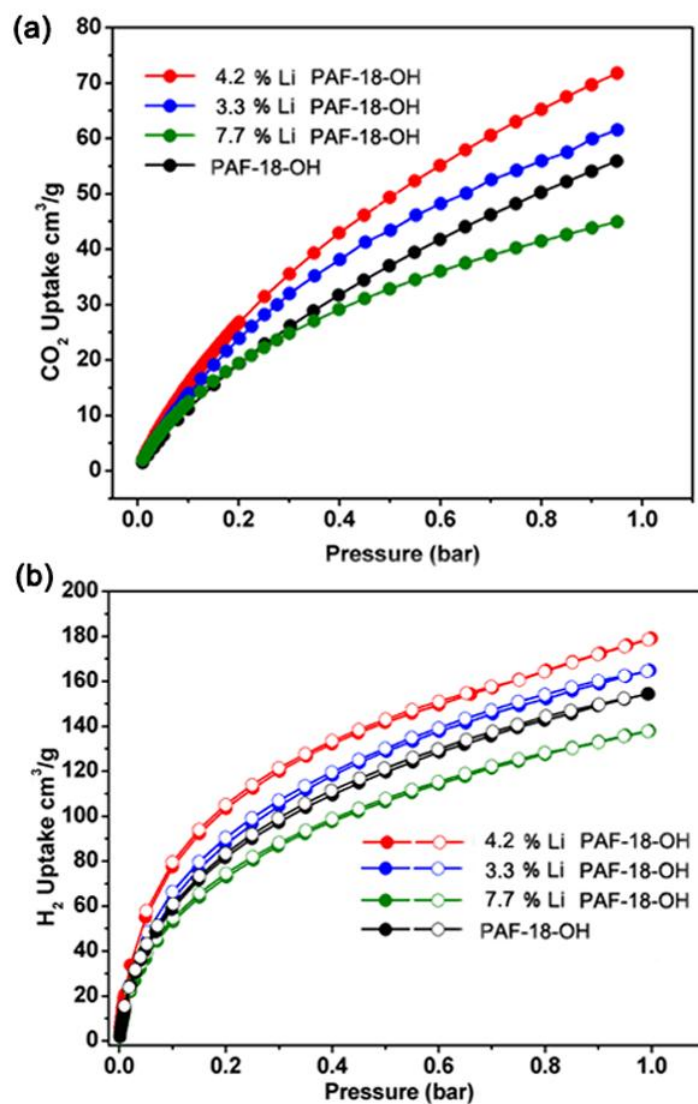

**Fig. S7** Plots of CO<sub>2</sub> (a) and H<sub>2</sub> (b) adsorption isotherms on PAF-18-OH and PAF-18-OLi with different Li contents.

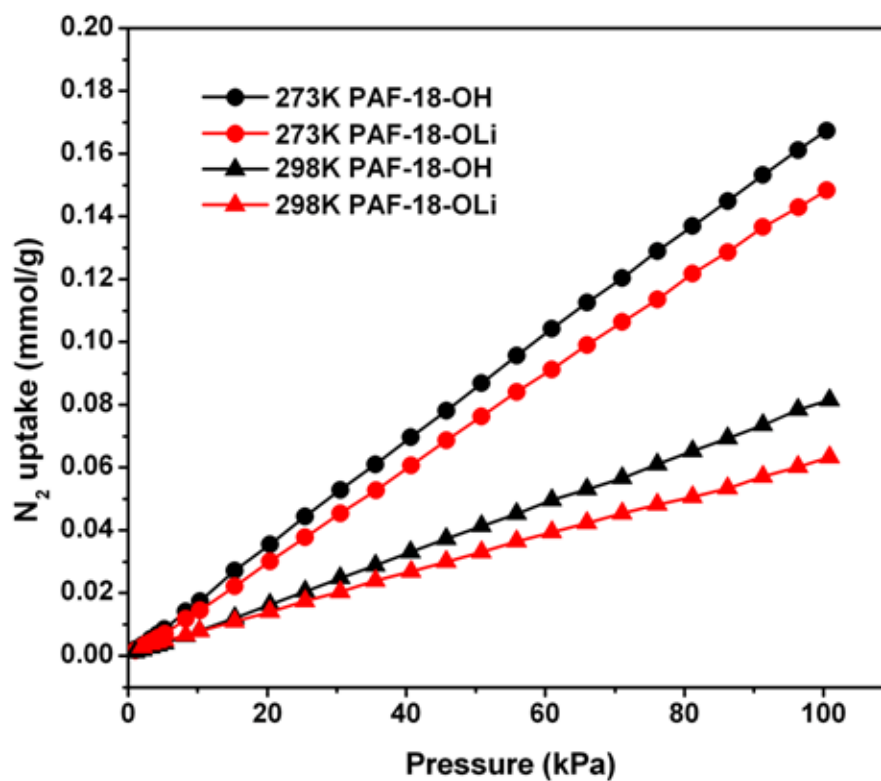

**Fig. S8** N<sub>2</sub> adsorption isotherms of PAF-18-OH and PAF-18-OLi at 273 K and 298 K.

**Table S1** The summary of the BET surface areas and gas uptakes of PAF-18-OH and PAF-18-OLi with different Li contents.

|  | Samples | Li content<br>(wt %) | S <sub>BET</sub><br>(m <sup>2</sup> g <sup>-1</sup> ) | H <sub>2</sub> uptake<br>(wt %) | CO <sub>2</sub> uptake<br>(wt %) |  |
|--|---------|----------------------|-------------------------------------------------------|---------------------------------|----------------------------------|--|
|  | 1       | 0                    | 1121                                                  | 1.4                             | 11                               |  |
|  | 2       | 3.3                  | 1046                                                  | 1.5                             | 12.2                             |  |
|  | 3       | 4.2                  | 981                                                   | 1.7                             | 14.4                             |  |
|  | 4       | 7.7                  | 948                                                   | 1.2                             | 8.8                              |  |

### Calculation of $Q_{st}$ :

The  $Q_{st}$  of  $CO_2$  was calculated as a function of the  $CO_2$  uptake based on the adsorption isotherms at 273 K and 298 K (the isotherms and fitting parameters are shown in Fig. S9-S10). The  $Q_{st}$  of  $H_2$  was calculated as a function of the  $H_2$  uptake based on the adsorption isotherms at 77 K and 87 K (the isotherms and fitting parameters are shown in Fig. S11-S12). The data were modelled with a virial-type expression composed of parameters  $a_i$  and  $b_i$  according to Eq 1. The isosteric heat of adsorption was calculated by fitting the parameters according to Eq 2. In these two equations,  $p$  is the pressure,  $N$  is the amount adsorbed,  $T$  is the temperature, and  $R$  is the universal gas constant.  $m$  and  $n$  determine the number of terms required to adequately describe the isotherm.  $a_i$  and  $b_i$  are virial coefficients.

$$\ln p = \ln N + \frac{1}{T} \sum_{i=0}^m a_i N^i + \sum_{i=0}^n b_i N^i \quad (1)$$

$$Q_{st} = -R \sum_{i=0}^m a_i N^i \quad (2)$$

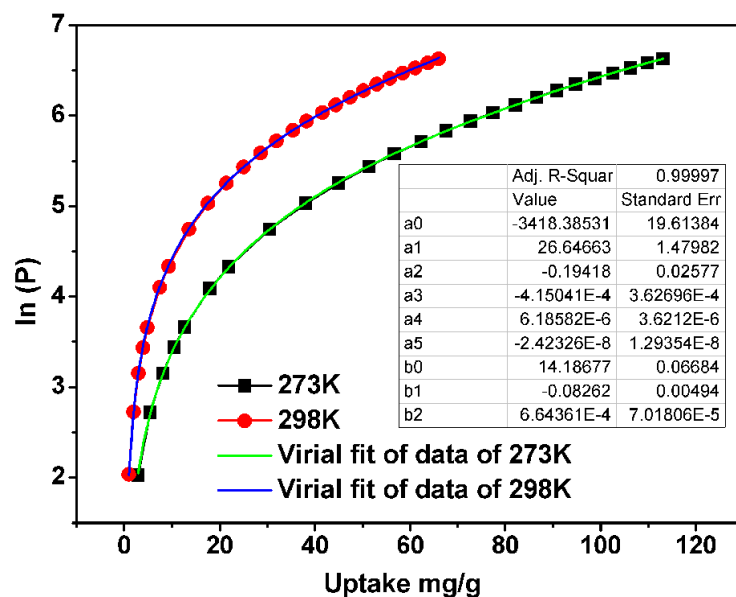

**Fig. S9** CO<sub>2</sub> adsorption isotherms of PAF-18-OH at 273K and 298K and the corresponding fittings based on the virial equation.

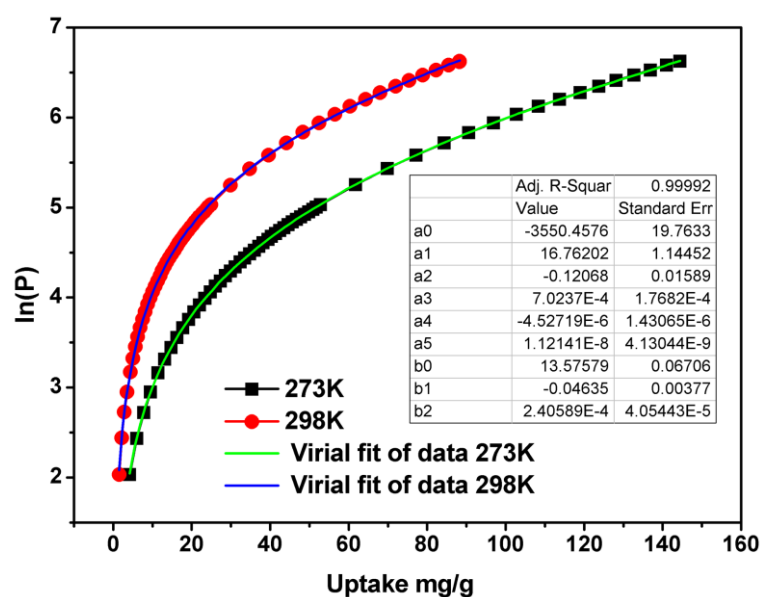

**Fig. S10** CO<sub>2</sub> adsorption isotherms of PAF-18-OLi at 273K and 298K and the corresponding fittings based on the virial equation.

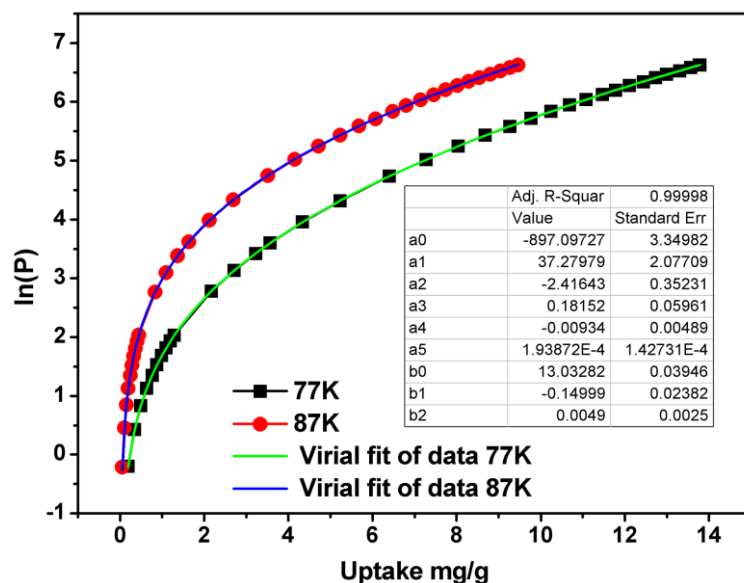

**Fig. S11** H<sub>2</sub> adsorption isotherms of PAF-18-OH at 77 K and 87 K and the corresponding fittings based on the virial equation.

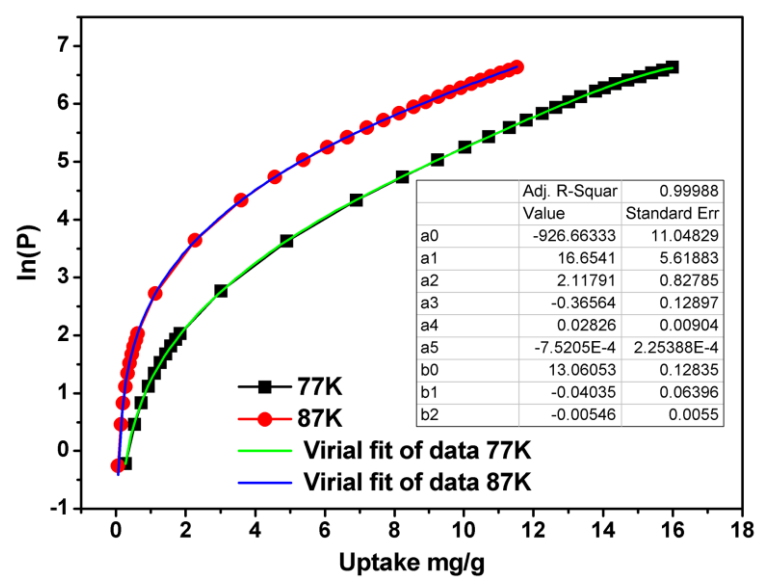

**Fig. S12** Hydrogen adsorption isotherms of PAF-18-OLi at 77 K and 87 K and the corresponding fittings based on the virial equation.

### **Ideal Adsorption Solution Theory calculations:**

The ideal adsorption solution theory (IAST) was used to predict the binary mixture adsorption of CO<sub>2</sub> and N<sub>2</sub> from the experimental pure-gas isotherms. Previous studies have shown that the IAST can predict mixture gas adsorption in many nanoporous materials, including porous-organic frameworks. The single-component isotherms were fitted using a dual-site Langmuir-Freundlich equation:

$$q = q_{m1} \cdot \frac{b_1 \cdot p^{1/n_1}}{1 + b_1 \cdot p^{1/n_1}} + q_{m2} \cdot \frac{b_2 \cdot p^{1/n_2}}{1 + b_2 \cdot p^{1/n_2}}$$

Here,  $p$  is the pressure of the bulk gas at equilibrium with the adsorbed phase (kPa),  $q$  is the adsorbed amount per mass of adsorbent (mmol/g),  $q_{m1}$  and  $q_{m2}$  are the saturation capacities of sites 1 and 2 (mmol/g),  $b_1$  and  $b_2$  are the affinity coefficients of sites 1 and 2 (1/kPa), and  $n_1$  and  $n_2$  represent the deviations from an ideal homogeneous surface.

The IAST adsorption selectivity,  $S$ , for binary mixtures of CO<sub>2</sub> (1)/N<sub>2</sub> (2), is defined as follows:

$$S = \frac{q_1 / q_2}{p_1 / p_2}$$

where  $q_i$  and  $p_i$  ( $i=1,2$ ) are the mole fractions of component 1 and 2 in the adsorbed and bulk phases, respectively. The IAST calculations were carried out for binary mixture containing 15% CO<sub>2</sub> and 85% N<sub>2</sub>, which is typical composition of flue gases.

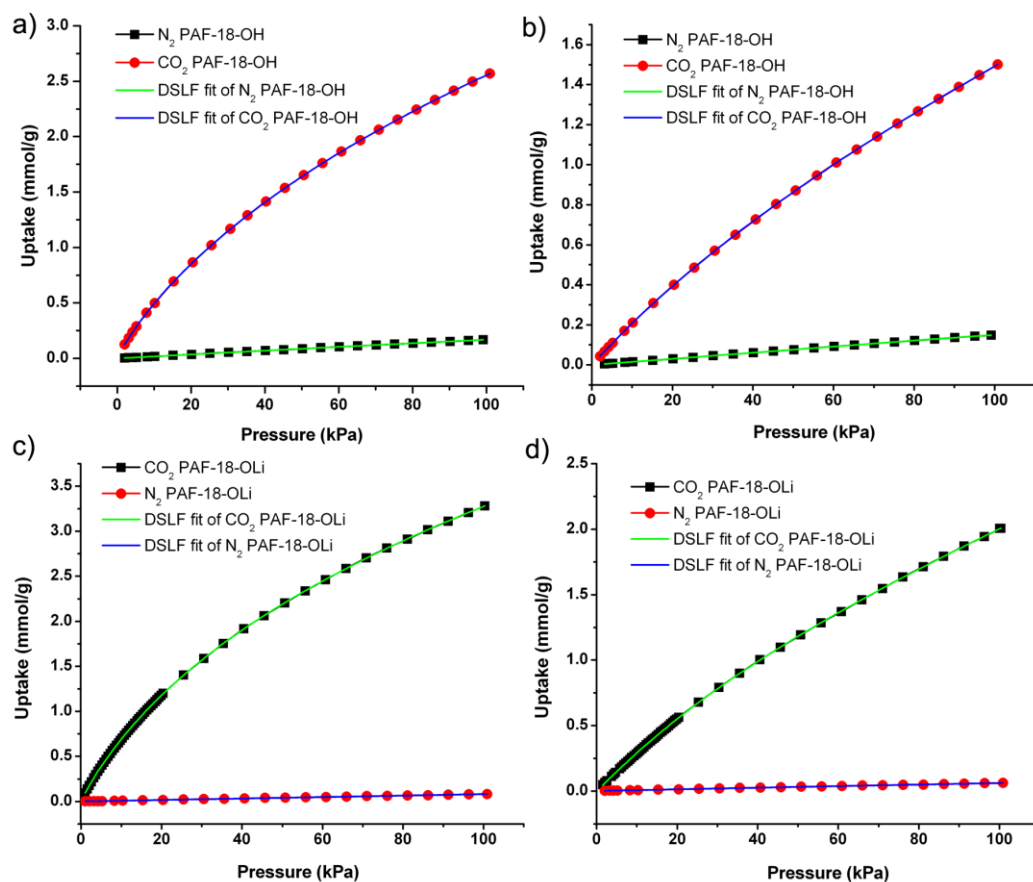

**Fig. S13** The adsorption isotherms of pure component  $\text{CO}_2$  and  $\text{N}_2$  for PAF-18-OH at 273K (a) and 298K (b), and for PAF-18-OLi at 273K (c) and 298K (d). Isotherms are fitted using the dual-site Langmuir-Freundlich equation.
